# Supplementary material for: Nanoporous (Pt1−xFex)3Al intermetallic compounds for greatly enhanced oxygen electroreduction catalysis
Source: Royal Society of Chemistry journal article supplement (doi:10.1039/c6ta07380h), 2016-01-01
Supplement: c6ta07380h1.pdf [file c6ta07380h1.pdf]

## Supplementary Information

*for*

### **Nanoporous (Pt<sub>1-x</sub>Fe<sub>x</sub>)<sub>3</sub>Al intermetallic compounds for much enhanced oxygen electroreduction catalysis**

Tuo Cheng, Xing-You Lang,\* Gao-Feng Han, Rui-Qi Yao, Zi Wen, Qing Jiang\*

*Key Laboratory of Automobile Materials (Jilin University), Ministry of Education,*

*and School of Materials Science and Engineering, Jilin University, Changchun*

*130022, China*

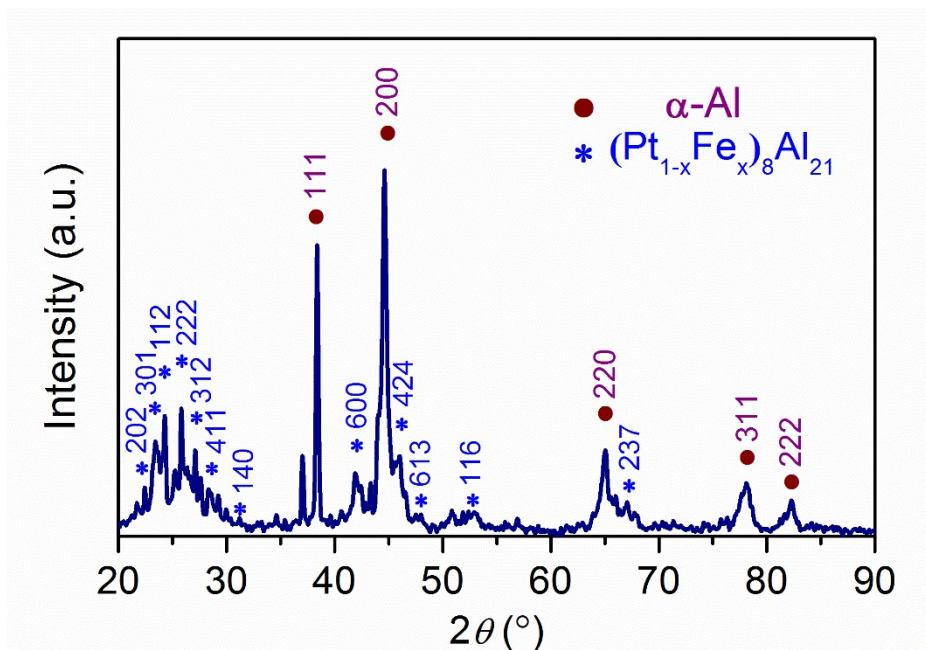

**Figure S1.** X-ray diffraction (XRD) pattern of precursor  $\text{Pt}_{10}\text{Fe}_2\text{Al}_{88}$  alloy ribbons.

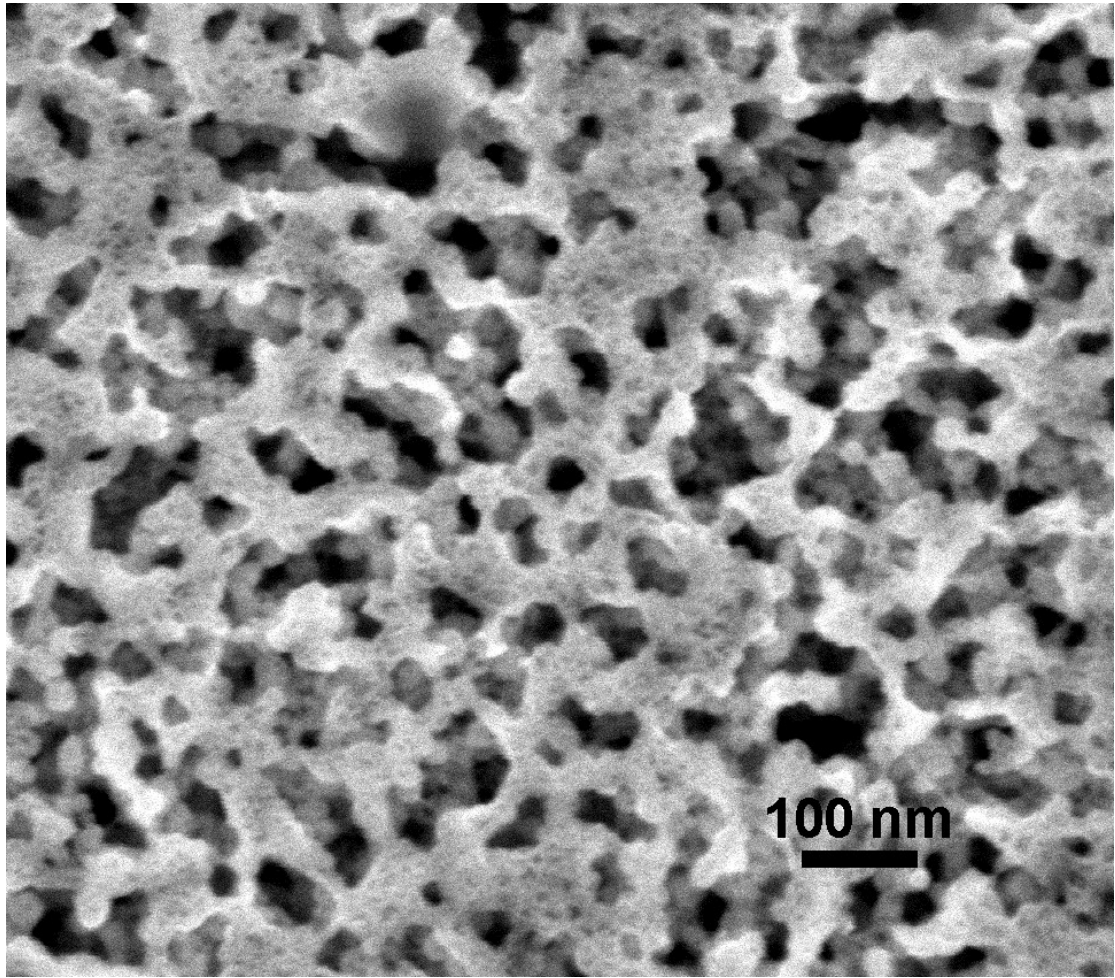

**Figure S2.** Typically top-view SEM image of the dealloyed NP  $(\text{Pt}_{1-x}\text{Fe}_x)_3\text{Al}/\text{Pt}$ .

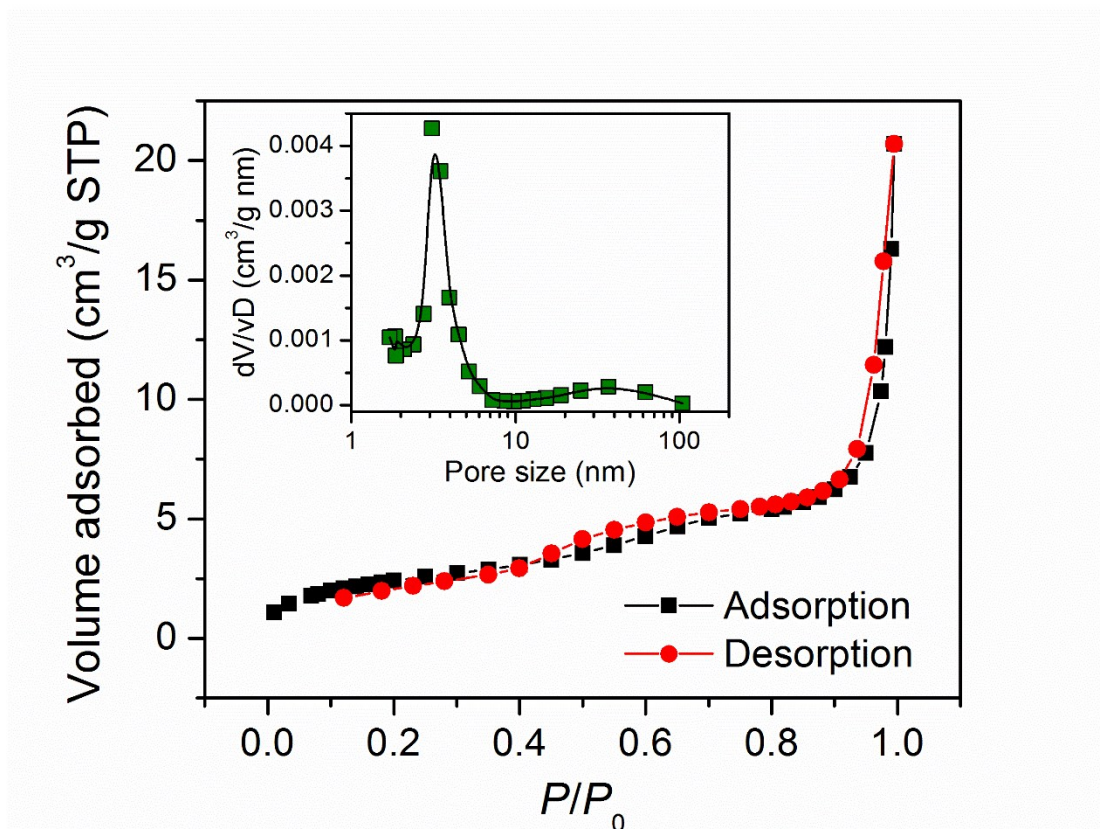

**Figure S3.** Nitrogen adsorption/desorption isotherm of NP (Pt<sub>1-x</sub>Fe<sub>x</sub>)<sub>3</sub>Al/Pt. (Inset shows the pore size distribution).

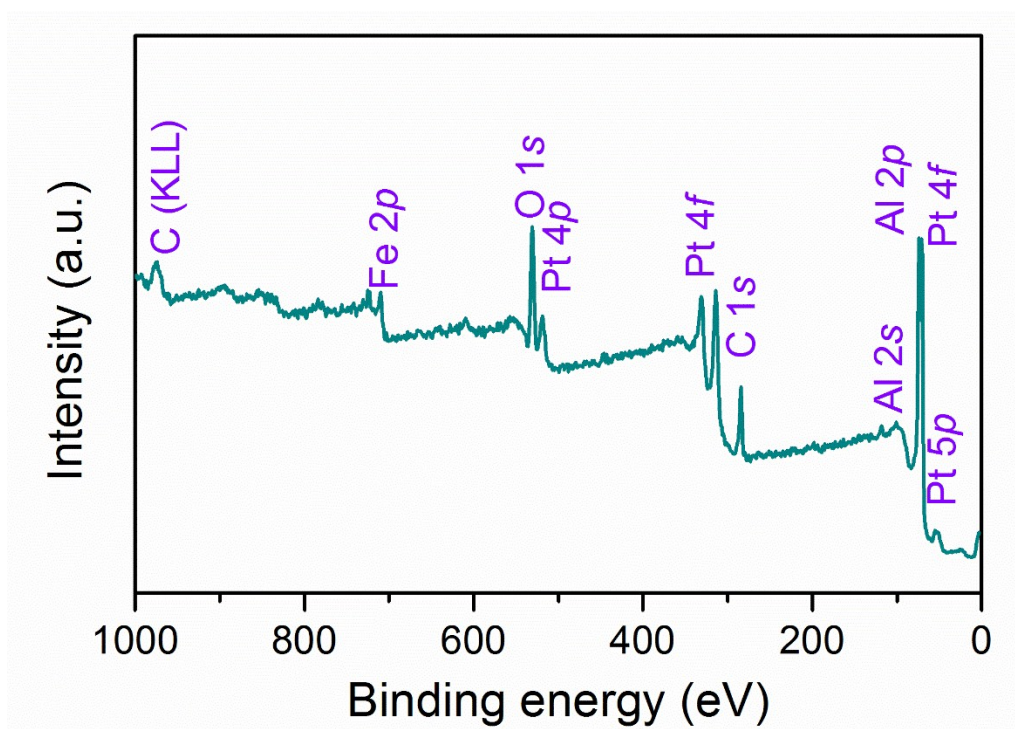

**Figure S4.** XPS survey spectrum for the as-dealloyed NP  $(\text{Pt}_{1-x}\text{Fe}_x)_3\text{Al}/\text{Pt}$ .

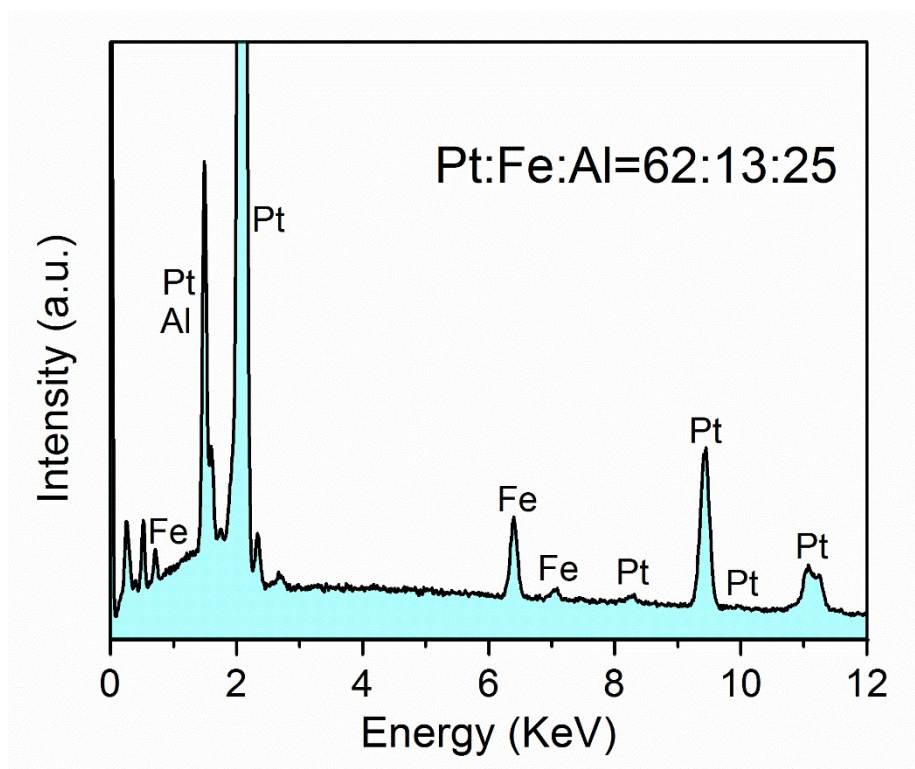

**Figure S5.** EDS of the as-dealloyed NP  $(\text{Pt}_{1-x}\text{Fe}_x)_3\text{Al}/\text{Pt}$  particles.

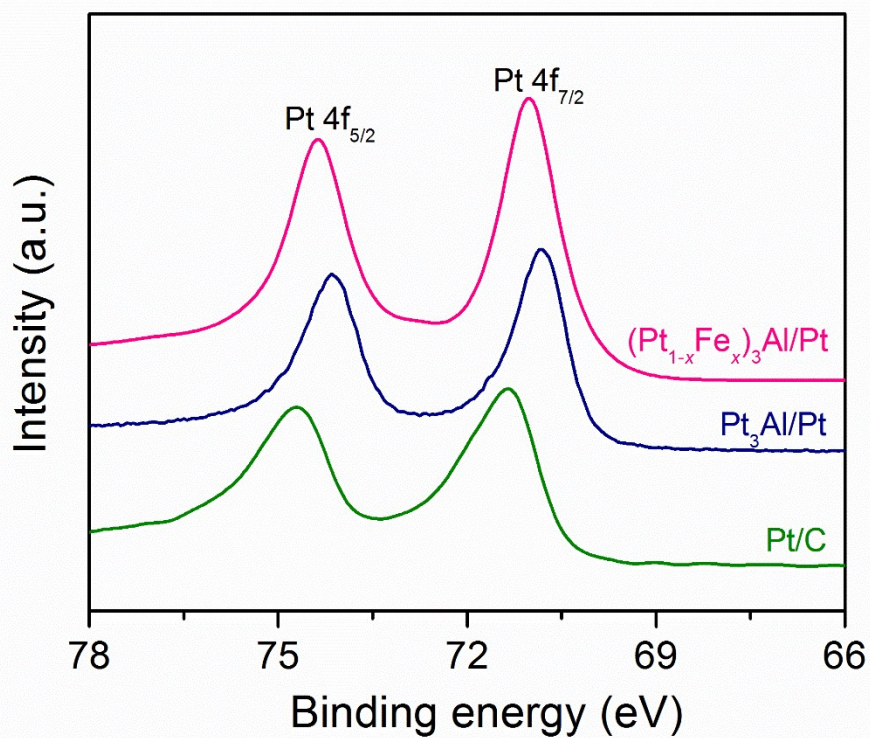

**Figure S6.** High-resolution XPS spectra of Pt 4f for NP (Pt<sub>1-x</sub>Fe<sub>x</sub>)<sub>3</sub>Al/Pt, Pt<sub>3</sub>Al/Pt and Pt/C nanocatalysts.

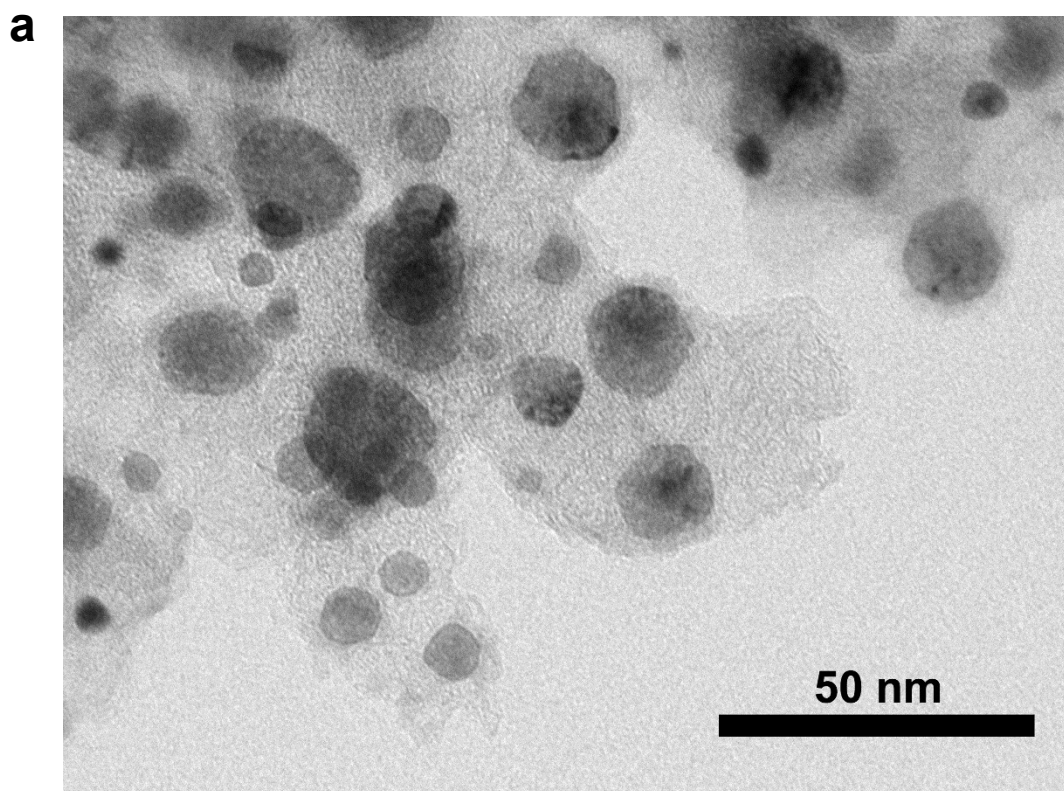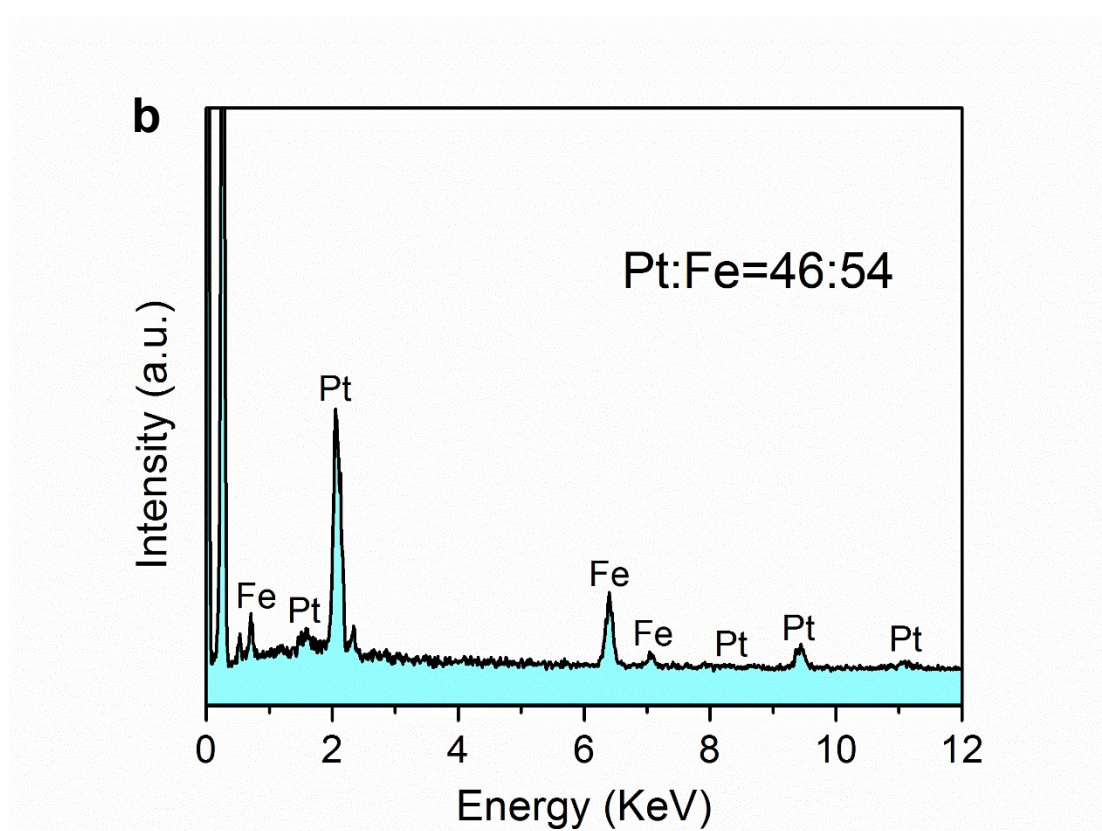

**Figure S7.** (a) TEM image and (b) EDS of NP  $\text{Pt}_{46}\text{Fe}_{54}/\text{Pt}/\text{C}$  particles, which are fabricated by dealloying  $\text{Pt}_{28}\text{Fe}_{72}/\text{C}$  precursor.



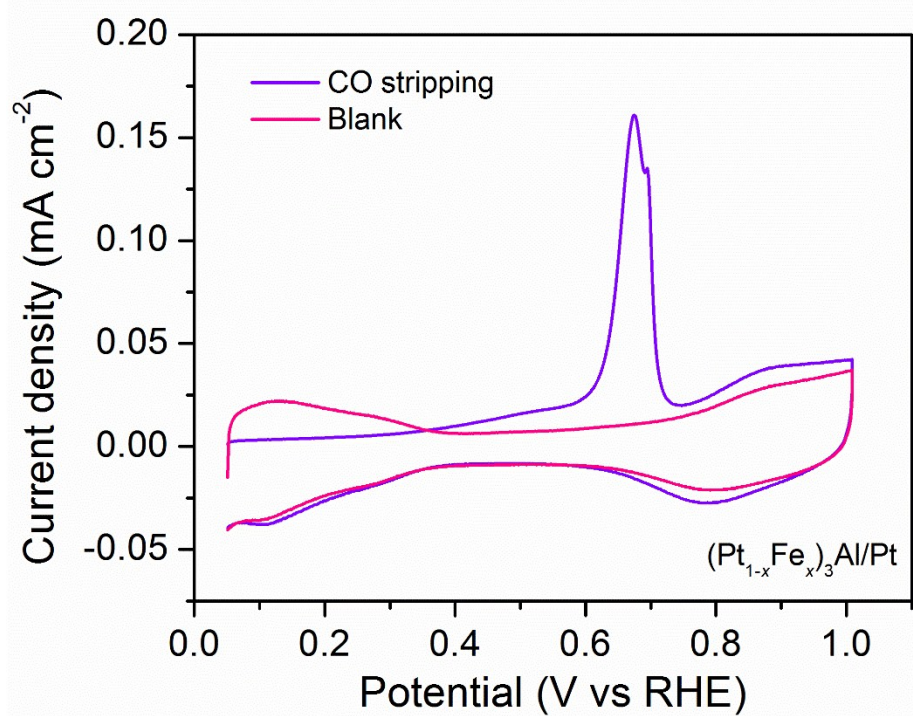

**Figure S8.** CV curves of  $(Pt_{1-x}Fe_x)_3Al/Pt$  signifying the difference in surface coverage by  $H_{upd}$  and  $OH_{ad}$ . ECSA of the NP  $(Pt_{1-x}Fe_x)_3Al/Pt$  are determined by integrated charge of adsorbed CO electro-oxidation curves.

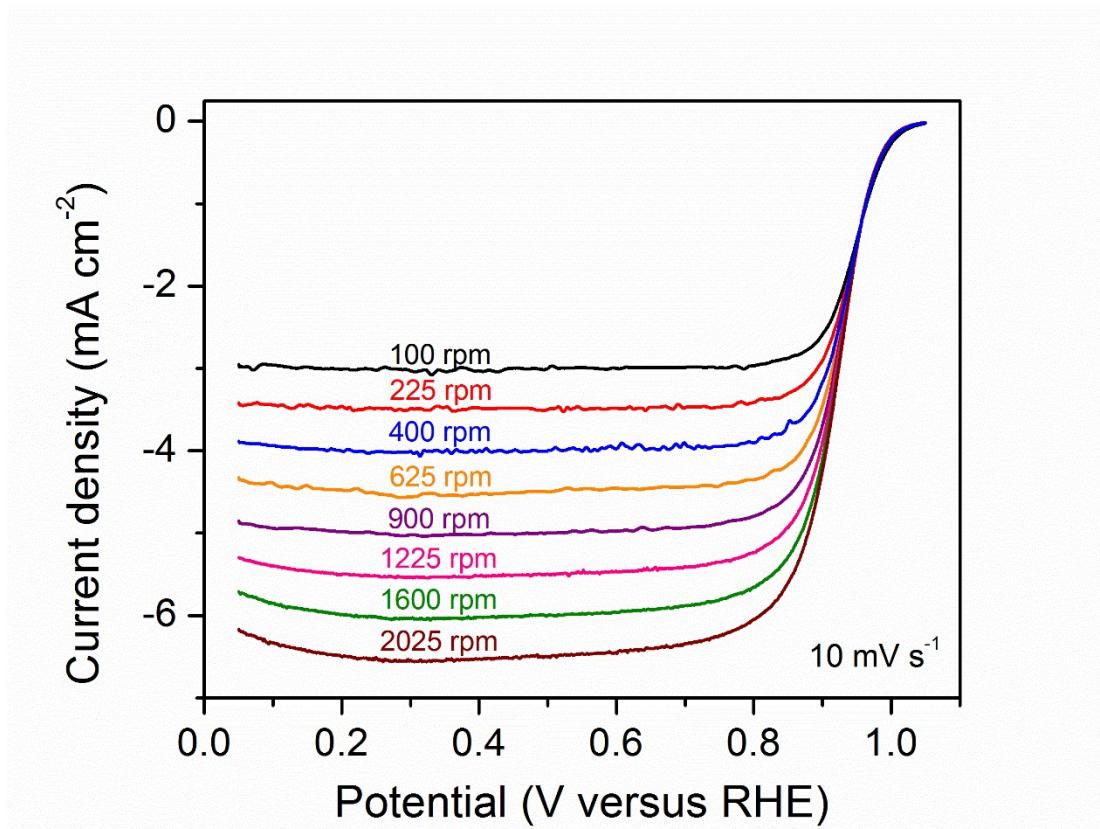

**Figure S9.** ORR polarization curves of NP (Pt<sub>1-x</sub>Fe<sub>x</sub>)<sub>3</sub>Al/Pt in an O<sub>2</sub>-saturated 0.1 M HClO<sub>4</sub> solutions at room temperature and a scan rate of 10 mV s<sup>-1</sup> with different rotation speeds.

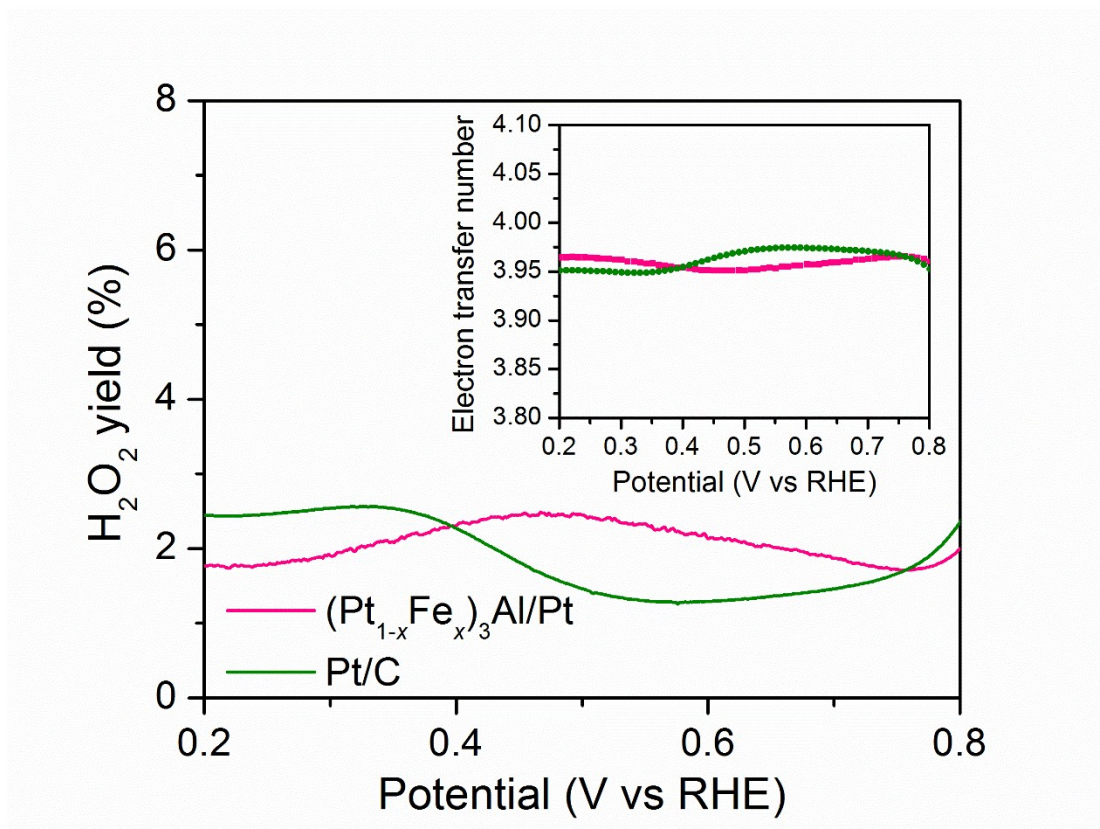

**Figure S10.** H<sub>2</sub>O<sub>2</sub> yield of NP (Pt<sub>1-x</sub>Fe<sub>x</sub>)<sub>3</sub>Al/Pt and Pt/C catalyst. Inset: Electron transfer number as functions of the electrode potential.

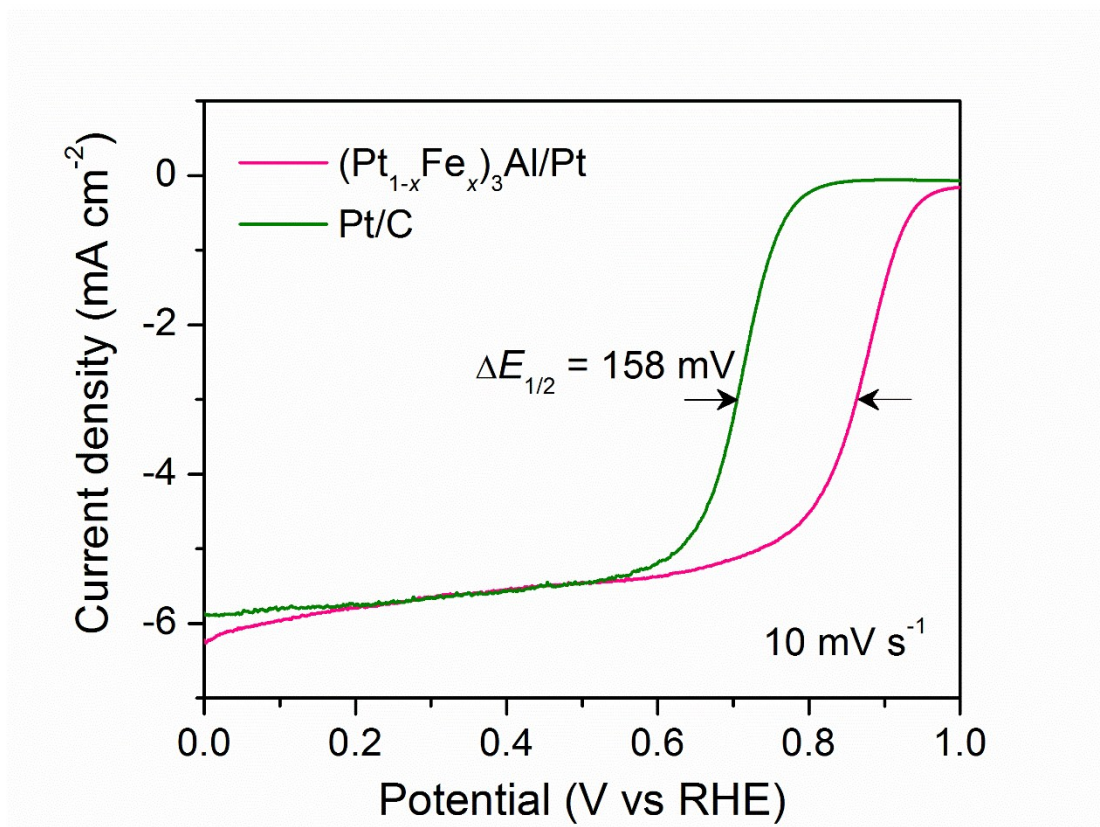

**Figure S11.** ORR polarization curves for NP  $(\text{Pt}_{1-x}\text{Fe}_x)_3\text{Al}/\text{Pt}$  and Pt/C in  $\text{O}_2$ -purged 0.1 M KOH solution at room temperature with a scan rate of  $10 \text{ mV s}^{-1}$  and a rotation rate of 1600 r.p.m..

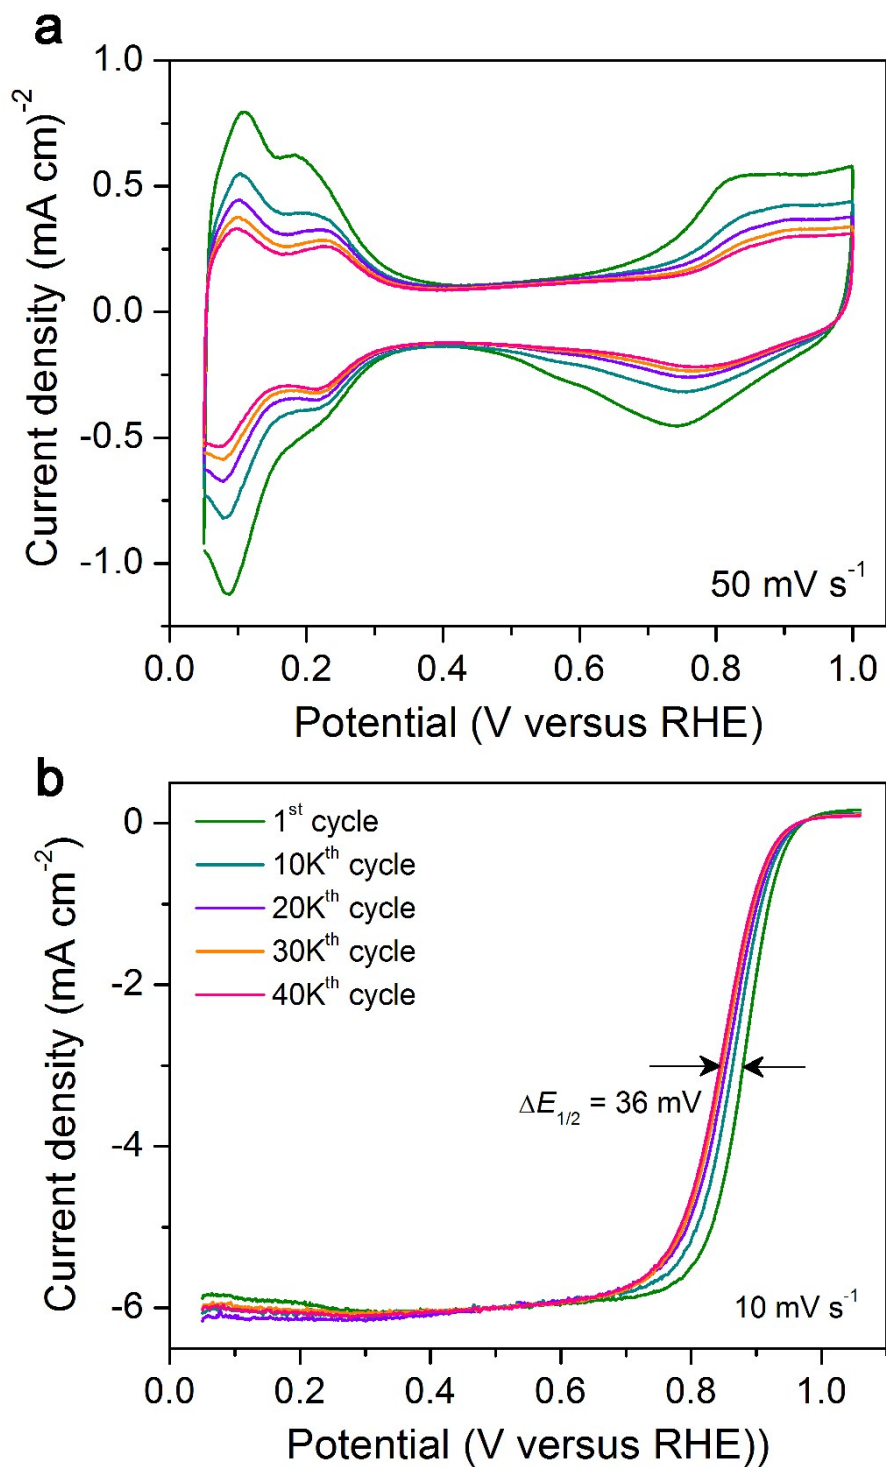

**Figure S12.** (a) CV curves for the 40,000-cycle stability test of Pt/C nanocatalyst in N<sub>2</sub>-purged 0.1 M HClO<sub>4</sub> at 50 mV s<sup>-1</sup> within a potential window of 0.6 to 1.0 V. (b) ORR polarization curves for the Pt/C nanocatalyst in a long-term cycling test of 40,000 potential cycles, collected in O<sub>2</sub>-saturated 0.1 M HClO<sub>4</sub> aqueous electrolyte at room temperature with a rotation rate of 1600 r.m.p. and a scan rate of 10 mV s<sup>-1</sup>.

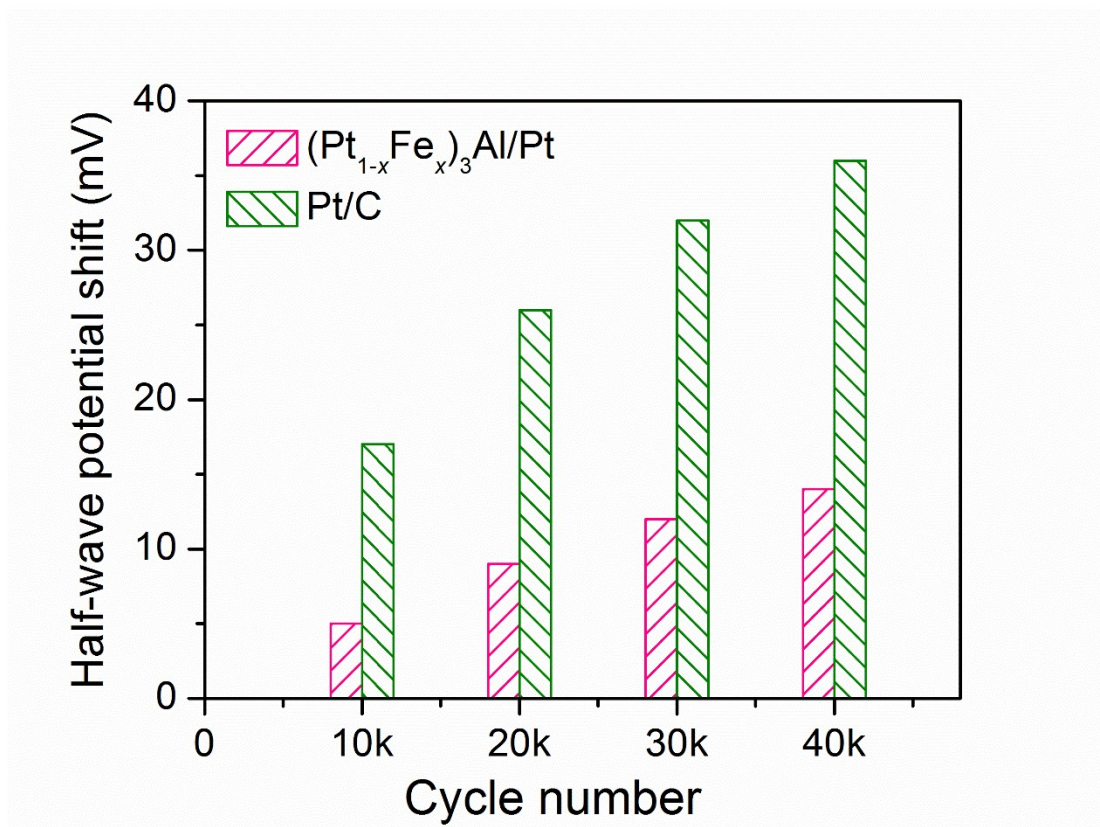

**Figure S13.** Evolution of half-wave potential for NP  $(\text{Pt}_{1-x}\text{Fe}_x)_3\text{Al/Pt}$  and Pt/C nanocatalysts as a function of cycle number.

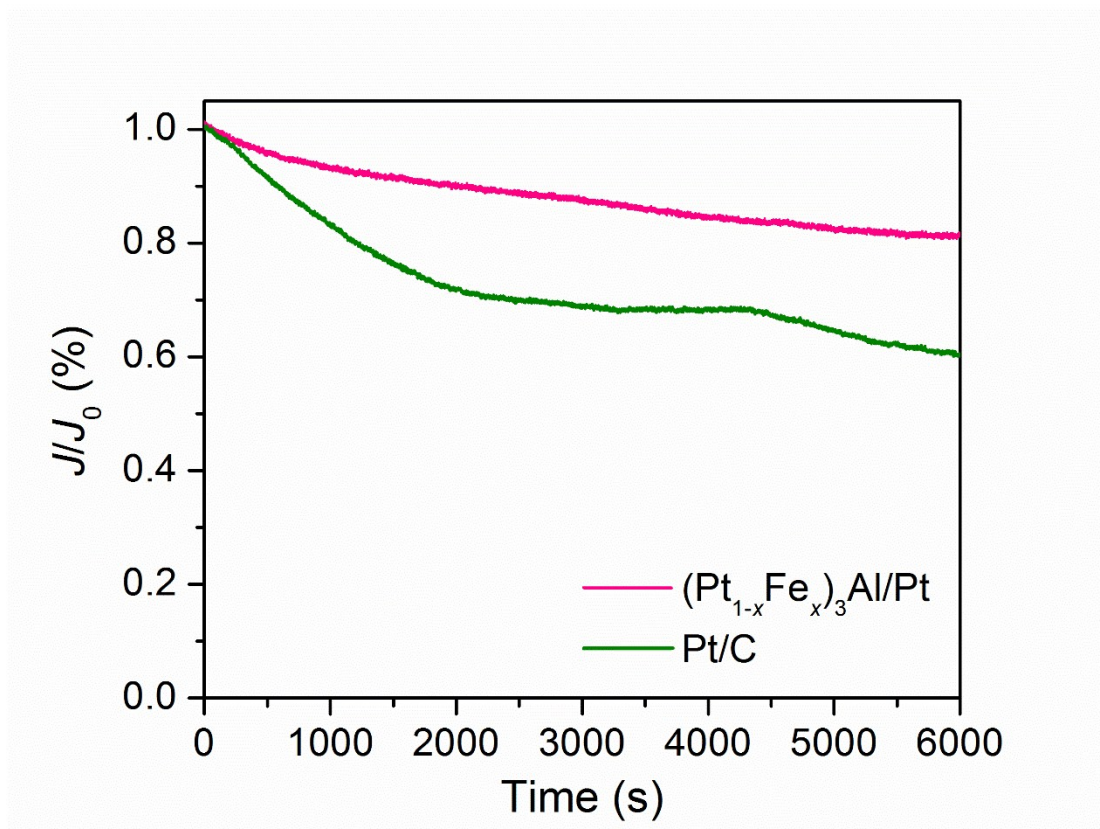

**Figure S14.** Normalized Current-time curves of NP  $(Pt_{1-x}Fe_x)_3Al/Pt$  and Pt/C catalysts in  $O_2$ -saturated 0.1 M  $HClO_4$  solution at 0.9 V.
